# Supplementary material for: Remdesivir Decreases Mortality in COVID-19 Patients with Active Malignancy
Source: MDPI journal article supplement (doi:10.3390/cancers14194720), 2022-09-28
Supplement: s1 [file s1]

**Table S1.** Baseline characteristics of studied cohort stratified by gender and early hospital death.

| Characteristic                                                                                                                                                                                                                                                                                      | Died<br>n=59          |                        | Survived<br>n=163      |                        | P value<br>* |
|-----------------------------------------------------------------------------------------------------------------------------------------------------------------------------------------------------------------------------------------------------------------------------------------------------|-----------------------|------------------------|------------------------|------------------------|--------------|
| Gender                                                                                                                                                                                                                                                                                              | Female<br>n=20        | Male<br>n=39           | Female<br>n=87         | Male<br>n=76           | 0.0146       |
| Age in years, median (IQR)                                                                                                                                                                                                                                                                          | 73 (68-81)            | 69 (63-81)             | 69 (62-78)             | 70 (65-76)             | 0.3105       |
| BMI in kg/m <sup>2</sup> , median (IQR)                                                                                                                                                                                                                                                             | 29.4 (25.6-32.4)      | 25.2 (23.0-30.3)       | 26.2 (23.0-29.4)       | 27.1 (24.0-29.4)       | 0.7718       |
| Hematological cancer, n (%)                                                                                                                                                                                                                                                                         | 6 (30.0)              | 6 (15.4)               | 29 (33.3)              | 19 (25.0)              | 0.2310       |
| SpO <sub>2</sub> in % at hospital admission, median (IQR)                                                                                                                                                                                                                                           | 89 (82-95.5)          | 82 (74-91)             | 92 (89-95)             | 92 (87-96)             | <0.0001      |
| CRP baseline [mg/dL], median (IQR)                                                                                                                                                                                                                                                                  | 115.1 (39.1-146.0)    | 95.8 (40.7-195.0)      | 55.4 (24.5-90.8)       | 61.6 (19.7-143.7)      | 0.0008       |
| Procalcitonin baseline [ng/mL], median (IQR)                                                                                                                                                                                                                                                        | 0.18 (0.06-1.69)      | 0.29 (0.14-0.91)       | 0.09 (0.05-0.22)       | 0.18 (0.05-0.42)       | 0.0017       |
| WBC baseline [/uL], median (IQR)                                                                                                                                                                                                                                                                    | 6620 (3015-11110)     | 7930 (4930-13600)      | 4605 (3420-722)        | 6090 (3855-9200)       | 0.1280       |
| Lymphocytes baseline [/uL], median (IQR)                                                                                                                                                                                                                                                            | 630 (510-1000)        | 700 (490-950)          | 960 (640-1340)         | 1000 (700-1400)        | 0.0014       |
| Neutrocytes baseline [/uL], median (IQR)                                                                                                                                                                                                                                                            | 3350 (1770-8550)      | 5910 (3000-11340)      | 2955 (1925-5140)       | 3900 (2440-6400)       | 0.0091       |
| PLT baseline [/uL], median (IQR)                                                                                                                                                                                                                                                                    | 175000 (94200-251500) | 155000 (121000-251000) | 178500 (136000-256000) | 179000 (128000-241000) | 0.5771       |
| IL-6 baseline [pg/mL], median (IQR)                                                                                                                                                                                                                                                                 | 77.7 (38.3-163.2)     | 169.3 (60.5-467.3)     | 41.0 (18.4-86.7)       | 50.1 (13.2-100.5)      | <0.0001      |
| D-dimers baseline [ug/mL], median (IQR)                                                                                                                                                                                                                                                             | 1500 (1166-2290)      | 1940 (880-5620)        | 1035 (662-2167)        | 1215 (751-1812)        | 0.0025       |
| eGFR < 60 ml/min/m <sup>2</sup> baseline, n (%)                                                                                                                                                                                                                                                     | 10 (52.6)             | 21 (55.3)              | 21 (24.1)              | 24 (31.6)              | 0.0004       |
| Use of other medication at baseline, n (%)                                                                                                                                                                                                                                                          | 15 (75.0)             | 36 (92.3)              | 74 (87.1)              | 63 (82.9)              | 0.6666       |
| Multimorbidity, n (%)                                                                                                                                                                                                                                                                               | 14 (70.0)             | 29 (74.4)              | 57 (65%)               | 55 (72.4)              | 0.6212       |
| Use of RDV, n (%)                                                                                                                                                                                                                                                                                   | 4 (20.0)              | 5 (12.8)               | 28 (32.2)              | 21 (27.6)              | 0.0370       |
| Use of TCZ, n (%)                                                                                                                                                                                                                                                                                   | 3 (15.0)              | 10 (25.6)              | 10 (11.5)              | 13 (17.1)              | 0.2150       |
| Use of dexamethasone, n (%)                                                                                                                                                                                                                                                                         | 12 (60.0)             | 25 (64.1)              | 40 (46.0)              | 33 (43.4)              | 0.0226       |
| Use of convalescent plasma, n (%)                                                                                                                                                                                                                                                                   | 3 (15.0)              | 5 (12.8)               | 20 (32.2)              | 15 (19.7)              | 0.2488       |
| * P between patients who died vs who survived. * Fisher exact test; Abbreviations: BMI – body mass index; IQR - interquartile range; SpO <sub>2</sub> - oxygen peripheral blood saturation; CRP – C-reactive protein; WBC – white blood cells, PLT – platelets; RDV – remdesivir; TCZ – tocilizumab |                       |                        |                        |                        |              |
